# Supplementary material
Source: publisher figshare collection journal article supplement (https://asha.figshare.com/articles/dataset/_/14963811)
Supplement: Supplementary file [file 1]

**Supplemental Table 3.** Results of first stage univariable analysis and descriptive statistics for demographic and early childhood variables associated with persistent speech sound disorder (SSD; reporting all *ps* including those > .1, which were not carried through to the within-groups stage analysis). Bold values indicate  $p < .1$ .

| Grouped variables <sup>a</sup>                     | Category <sup>‡</sup> | Total sample<br><i>N</i> | Case children<br>summary<br>data <sup>b</sup> | Rest of the<br>cohort<br>summary<br>data <sup>b</sup> | Univariable model<br>odds ratio [95%<br>CI] | <i>p</i> |
|----------------------------------------------------|-----------------------|--------------------------|-----------------------------------------------|-------------------------------------------------------|---------------------------------------------|----------|
| <b>Demographics</b>                                |                       |                          |                                               |                                                       |                                             |          |
| Gender*                                            | Female                | 6662                     | 94 (2.8)                                      | 3303 (97.2)                                           | 1.0                                         | < .001   |
|                                                    | Male                  |                          | 169 (5.2)                                     | 3096 (94.8)                                           | 1.92 [1.48, 2.48]                           |          |
| Ethnicity*                                         | White                 | 6066                     | 233 (4.0)                                     | 5603 (96.0)                                           | 1.0                                         | .69      |
|                                                    | Non-White             |                          | 8 (3.5)                                       | 222 (96.5)                                            | 0.87 [0.42, 1.78]                           |          |
| Level of maternal education*                       | ‘O’level              | 6166                     | 79 (3.6)                                      | 2093 (96.4)                                           | 1.0                                         | .025     |
|                                                    | < O’level             |                          | 70 (5.2)                                      | 1265 (94.8)                                           | 1.47 [1.05, 2.04]                           |          |
|                                                    | > O’level             |                          | 93 (3.5)                                      | 2566 (96.5)                                           | 0.96 [0.71, 1.30]                           |          |
| Maternal occupation*†                              | Nonmanual             | 5909                     | 156 (3.3)                                     | 4616 (96.7)                                           | 1.0                                         | < .001   |
|                                                    | Manual                |                          | 64 (5.6)                                      | 1073 (94.4)                                           | 1.76 [1.31, 2.38]                           |          |
| Home ownership*                                    | Mortgages/owned       | 6199                     | 174 (3.4)                                     | 5007 (96.6)                                           | 1.0                                         | < .001   |
|                                                    | Rented/other          |                          | 70 (6.9)                                      | 948 (93.1)                                            | 2.12 [1.60, 2.83]                           |          |
| Maternal age**                                     |                       | 6382                     | 29.2 (4.8)                                    | 29.1 (4.6)                                            | 1.01 [0.98, 1.03]                           | .72      |
| <b>Environment</b>                                 |                       |                          |                                               |                                                       |                                             |          |
| Parity*                                            | 1st child             | 6161                     | 84 (2.9)                                      | 2805 (97.1)                                           | 1.0                                         | < .001   |
|                                                    | 2nd child             |                          | 100 (4.6)                                     | 2068 (95.4)                                           | 1.61 [1.20, 2.17]                           |          |
|                                                    | 3rd child or more     |                          | 55 (5.0)                                      | 1049 (95.0)                                           | 1.75 [1.24, 2.48]                           |          |
| Languages other than English used in the home*     | No                    | 5399                     | 194 (3.8)                                     | 4959 (96.2)                                           | 1.0                                         | .024     |
|                                                    | Yes                   |                          | 17 (6.9)                                      | 229 (93.1)                                            | 1.90 [1.14, 3.17]                           |          |
| Child attends day nursery/crèche at age 8 weeks*   | No                    | 6067                     | 232 (3.9)                                     | 5792 (96.1)                                           | 1.0                                         | .79      |
|                                                    | Yes                   |                          | 2 (4.7)                                       | 41 (95.3)                                             | 1.22 [0.29, 5.07]                           |          |
| Child attends day nursery/crèche at age 8 months*  | No                    | 5874                     | 219 (3.9)                                     | 5411 (96.1)                                           | 1.0                                         | .40      |
|                                                    | Yes                   |                          | 7 (2.9)                                       | 237 (97.1)                                            | 0.73 [0.34, 1.57]                           |          |
| Child attends day nursery/crèche at age 15 months* | No                    | 5888                     | 211 (3.9)                                     | 5270 (96.1)                                           | 1.0                                         | .93      |
|                                                    | Yes                   |                          | 16 (3.9)                                      | 391 (96.1)                                            | 1.02 [0.61, 1.72]                           |          |
| Child attends day nursery/crèche at age 24         | No                    | 5768                     | 206 (4.0)                                     | 4965 (96.0)                                           | 1.0                                         | .16      |

|                                                                      |                    |      |           |             |                   |        |
|----------------------------------------------------------------------|--------------------|------|-----------|-------------|-------------------|--------|
| months*                                                              | Yes                |      | 17 (2.9)  | 580 (97.1)  | 0.71 [0.43, 1.17] |        |
| Child attends playgroup, nursery, or a childminder at age 33 months* | No                 | 2763 | 68 (4.0)  | 1656 (96.0) | 1.0               | .39    |
|                                                                      | Yes                |      | 48 (4.6)  | 991 (95.4)  | 1.18 [0.81, 1.72] |        |
| Child attends day nursery/crèche at age 38 months*                   | No                 | 5770 | 150 (4.2) | 3441 (95.8) | 1.0               | .091   |
|                                                                      | Yes                |      | 72 (3.3)  | 2107 (96.7) | 0.78 [0.59, 1.04] |        |
| Child attends playgroup, nursery or childminder at age 47 months*    | No                 | 5583 | 13 (8.1)  | 148 (91.9)  | 1.0               | .013   |
|                                                                      | Yes                |      | 203 (3.7) | 5219 (96.3) | 0.44 [0.25, 0.79] |        |
| Child attends day nursery/crèche at age 54 months*                   | No                 | 4756 | 17 (3.7)  | 440 (96.3)  | 1.0               | .88    |
|                                                                      | Yes                |      | 166 (3.9) | 4133 (96.1) | 1.04 [0.63, 1.73] |        |
| Mum reads to child at age 18 months*                                 | Almost daily       | 5973 | 148 (3.4) | 4219 (96.6) | 1.0               | .003   |
|                                                                      | 3–5 times per week |      | 52 (4.7)  | 1050 (95.3) | 1.41 [1.02, 1.95] |        |
|                                                                      | < 3 times per week |      | 32 (6.3)  | 472 (93.7)  | 1.93 [1.30, 2.87] |        |
| Partner reads to child at age 18 months*                             | Almost daily       | 5750 | 64 (3.2)  | 1929 (96.8) | 1.0               | .035   |
|                                                                      | 3–5 times per week |      | 51 (3.5)  | 1412 (96.5) | 1.09 [0.75, 1.58] |        |
|                                                                      | < 3 times per week |      | 107 (4.7) | 2187 (95.3) | 1.47 [1.08, 2.02] |        |
| Either parent reads to child at age 18 months*                       | Almost daily       | 5984 | 168 (3.5) | 4612 (96.5) | 1.0               | .012   |
|                                                                      | 3–5 times per week |      | 44 (5.1)  | 814 (94.9)  | 1.48 [1.06, 2.09] |        |
|                                                                      | < 3 times per week |      | 21 (6.1)  | 325 (93.9)  | 1.77 [1.11, 2.83] |        |
| Mum reads to child at age 24 months*                                 | Almost daily       | 5795 | 126 (3.4) | 3593 (96.6) | 1.0               | .013   |
|                                                                      | 3–5 times per week |      | 66 (4.4)  | 1421 (95.6) | 1.32 [0.98, 1.80] |        |
|                                                                      | < 3 times per week |      | 34 (5.8)  | 555 (94.2)  | 1.75 [1.18, 2.58] |        |
| Mum reads to child at age 42 months*                                 | Almost daily       | 5727 | 140 (3.7) | 3620 (96.3) | 1.0               | .45    |
|                                                                      | 1–5 times per week |      | 62 (4.5)  | 1314 (95.5) | 1.22 [0.90, 1.66] |        |
|                                                                      | < Once per week    |      | 23 (3.9)  | 568 (96.1)  | 1.05 [0.67, 1.64] |        |
| Partner reads to child at age 42 months*                             | Almost daily       | 5434 | 69 (4.2)  | 1590 (95.8) | 1.0               | .77    |
|                                                                      | 1–5 times per week |      | 61 (3.7)  | 1587 (96.3) | 0.86 [0.62, 1.26] |        |
|                                                                      | < Once per week    |      | 81 (3.8)  | 2046 (96.2) | 0.91 [0.66, 1.27] |        |
| Another person reads to child at age 42 months*                      | Almost daily       | 2793 | 18 (3.9)  | 445 (96.1)  | 1.0               | .68    |
|                                                                      | 1–5 times per week |      | 35 (4.1)  | 812 (95.9)  | 1.07 [0.60, 1.90] |        |
|                                                                      | < Once per week    |      | 51 (3.4)  | 1432 (96.6) | 0.88 [0.51, 1.52] |        |
| Overcrowding index at 8 weeks gestation*§                            | ≤ 0.5              | 6132 | 90 (3.0)  | 2913 (97.0) | 0.1               | < .001 |
|                                                                      | > 0.5–0.75         |      | 80 (4.2)  | 1834 (95.8) | 1.41 [1.04, 1.92] |        |
|                                                                      | > 0.75–1           |      | 45 (4.6)  | 929 (95.4)  | 1.57 [1.09, 2.26] |        |
|                                                                      | > 1                |      | 22 (9.1)  | 219 (90.9)  | 3.25 [2.00, 5.29] |        |

|                                                           |                        |      |           |             |                   |      |
|-----------------------------------------------------------|------------------------|------|-----------|-------------|-------------------|------|
| Overcrowding index at age 21 months*§                     | ≤ 0.5                  | 5522 | 37 (3.0)  | 1180 (97.0) | 1.0               | .006 |
|                                                           | > 0.5–0.75             |      | 71 (3.2)  | 2152 (96.8) | 1.05 [0.70, 1.58] |      |
|                                                           | > 0.75–1               |      | 46 (5.0)  | 875 (95.0)  | 1.68 [1.08, 2.61] |      |
|                                                           | > 1                    |      | 59 (5.1)  | 1102 (94.9) | 1.71 [1.12, 2.60] |      |
| Overcrowding index at age 33 months*§                     | ≤ 0.5                  | 5501 | 40 (3.7)  | 1052 (96.3) | 1.0               | .083 |
|                                                           | > 0.5–0.75             |      | 70 (3.2)  | 2108 (96.8) | 0.87 [0.59, 1.30] |      |
|                                                           | > 0.75–1               |      | 91 (4.8)  | 1817 (95.2) | 1.32 [0.90, 1.93] |      |
|                                                           | > 1                    |      | 12 (3.7)  | 311 (96.3)  | 1.01 [0.53, 1.96] |      |
|                                                           |                        |      |           |             |                   |      |
| Family history of speech and language therapy attendance* | No                     | 6135 | 218 (3.7) | 5642 (96.3) | 1.0               | .007 |
|                                                           | Yes                    |      | 20 (7.3)  | 255 (92.7)  | 2.03 [1.26, 3.26] |      |
| Premature birth*                                          | No                     | 6382 | 237 (3.9) | 5773 (96.1) | 1.0               | .86  |
|                                                           | Yes                    |      | 14 (3.8)  | 358 (96.2)  | 0.95 [0.55, 1.65] |      |
| Method of delivery*                                       | Spontaneous            | 4434 | 152 (4.5) | 3198 (95.5) | 1.0               | .11  |
|                                                           | Assisted               |      | 21 (3.6)  | 563 (96.4)  | 0.78 [0.49, 1.25] |      |
|                                                           | Elective caesarean     |      | 6 (3.2)   | 182 (96.8)  | 0.69 [0.30, 1.59] |      |
|                                                           | Emergency caesarean    |      | 22 (7.1)  | 290 (92.9)  | 1.60 [1.00, 2.54] |      |
| Pregnancy complications—Hypertension*                     | No                     | 6662 | 256 (3.9) | 6232 (96.1) | 1.0               | .96  |
|                                                           | Yes                    |      | 7 (4.0)   | 167 (96.0)  | 1.02 [0.47, 2.20] |      |
| Pregnancy complications—Unexplained abdominal pain*       | No                     | 6662 | 247 (3.9) | 6081 (96.1) | 1.0               | .43  |
|                                                           | Yes                    |      | 16 (4.8)  | 318 (95.2)  | 1.24 [0.74, 2.08] |      |
| Pregnancy complications—Vaginal bleeding*                 | No                     | 6662 | 231 (3.8) | 5822 (96.2) | 1.0               | .096 |
|                                                           | Yes                    |      | 32 (5.3)  | 577 (94.8)  | 1.40 [0.96, 2.04] |      |
| Pregnancy complications—Vomiting*                         | No                     | 6662 | 233 (3.9) | 5710 (96.1) | 1.0               | .75  |
|                                                           | Yes                    |      | 30 (4.2)  | 689 (95.8)  | 1.07 [0.72, 1.57] |      |
| Any pregnancy complications*                              | No                     | 6662 | 189 (3.9) | 4672 (96.1) | 1.0               | .68  |
|                                                           | Yes                    |      | 74 (4.1)  | 1727 (96.9) | 1.06 [0.81, 1.39] |      |
| Child was breastfed*                                      | Never                  | 5896 | 48 (4.5)  | 1029 (95.5) | 1.0               | .51  |
|                                                           | For less than 3 months |      | 76 (4.0)  | 1805 (96.0) | 0.90 [0.62, 1.31] |      |
|                                                           | For 3 or more months   |      | 108 (3.7) | 2830 (96.3) | 0.82 [0.58, 1.16] |      |
| Ever smoked*                                              | No                     | 6224 | 124 (3.6) | 3310 (96.4) | 1.0               | .21  |

|                                                                                                  |     |      |            |             |                   |             |
|--------------------------------------------------------------------------------------------------|-----|------|------------|-------------|-------------------|-------------|
|                                                                                                  | Yes |      | 118 (4.2)  | 2672 (95.8) | 1.18 [0.91, 1.52] |             |
| Smoked pre-pregnancy*                                                                            | No  | 6255 | 171 (3.7)  | 4482 (96.3) | 1.0               | .15         |
|                                                                                                  | Yes |      | 72 (4.5)   | 1530 (95.5) | 1.23 [0.93, 1.63] |             |
| Smoked in 1st trimester*                                                                         | No  | 6255 | 190 (3.7)  | 4937 (96.3) | 1.0               | .13         |
|                                                                                                  | Yes |      | 53 (4.7)   | 1075 (95.3) | 1.28 [0.94, 1.75] |             |
| Smoked during last 2 weeks*                                                                      | No  | 6255 | 196 (3.6)  | 5189 (96.4) | 1.0               | <b>.017</b> |
|                                                                                                  | Yes |      | 47 (5.4)   | 823 (94.6)  | 1.51 [1.09, 2.10] |             |
| Mother had her first child as a teenager*                                                        | No  | 6251 | 209 (3.8)  | 5262 (96.2) | 1.0               | .58         |
|                                                                                                  | Yes |      | 33 (4.2)   | 747 (95.8)  | 1.11[0.76, 1.62]  |             |
|                                                                                                  |     |      |            |             |                   |             |
| Depression subscale of the Edinburgh Post Natal Depression Scales (EPDS) at 18 weeks gestation** |     | 5889 | 6.6 (4.4)  | 6.5 (4.6)   | 1.00 [0.98, 1.03] | .78         |
| Depression subscale of the EPDS at 32 weeks gestation**                                          |     | 6045 | 6.5 (4.5)  | 6.7 (4.8)   | 0.99 [0.97, 1.02] | .64         |
| Depression subscale of the EPDS at age 8 weeks**                                                 |     | 6063 | 6.0 (4.7)  | 5.8 (4.5)   | 1.01 [0.98, 1.04] | .43         |
| Depression subscale of the EPDS at age 8 months**                                                |     | 5979 | 5.0 (4.3)  | 5.2 (4.5)   | 0.99 [0.96, 1.02] | .52         |
| Depression subscale of the EPDS at age 21 months**                                               |     | 5766 | 5.4 (4.6)  | 5.5 (4.6)   | 1.00 [0.97, 1.03] | .80         |
| Depression subscale of the EPDS at age 33 months**                                               |     | 5597 | 5.9 (4.8)  | 6.1 (4.9)   | 0.99 [0.96, 1.02] | .54         |
|                                                                                                  |     |      |            |             |                   |             |
| Anxiety subscale of the Crown–Crisp Experiential Index (CCEI) at 18 weeks gestation**            |     | 5840 | 4.5 (3.5)  | 4.7 (3.4)   | 0.98 [0.94, 1.02] | .43         |
| Depression subscale of the CCEI at 18 weeks gestation**                                          |     | 5840 | 4.0 (2.7)  | 4.2 (2.9)   | 0.97 [0.93, 1.02] | .25         |
| Somatic subscale of the CCEI at 18 weeks gestation**                                             |     | 5840 | 4.1 (2.3)  | 4.1 (2.3)   | 0.99 [0.93, 1.05] | .71         |
| Total of subscales of the CCEI at 18 weeks gestation**                                           |     | 5840 | 12.6 (7.1) | 13.0 (7.3)  | 0.99 [0.97, 1.01] | .34         |
|                                                                                                  |     |      |            |             |                   |             |
| Anxiety subscale of the CCEI at 32 weeks gestation**                                             |     | 5982 | 4.8 (3.5)  | 4.9 (3.5)   | 0.99 [0.95, 1.03] | .69         |
| Depression subscale of the CCEI at 32 weeks gestation**                                          |     | 5982 | 4.7 (3.1)  | 4.8 (3.1)   | 0.99 [0.95, 1.03] | .70         |
| Somatic subscale of the CCEI at 32 weeks                                                         |     | 5982 | 5.1 (2.9)  | 5.0 (2.6)   | 1.01 [0.96, 1.07] | .59         |

|                                                               |                  |      |            |             |                   |        |
|---------------------------------------------------------------|------------------|------|------------|-------------|-------------------|--------|
| gestation**                                                   |                  |      |            |             |                   |        |
| Total of subscales of the CCEI at 32 weeks gestation**        |                  | 5982 | 14.6 (8.0) | 14.6 (7.9)  | 1.00 [0.98, 1.02] | .88    |
|                                                               |                  |      |            |             |                   |        |
| Anxiety subscale of the CCEI at age 8 weeks**                 |                  | 6061 | 3.3 (3.2)  | 3.3 (3.1)   | 1.00 [0.96, 1.04] | .97    |
| Depression subscale of the CCEI at age 8 weeks**              |                  | 6061 | 3.5 (2.9)  | 3.4 (2.9)   | 1.02 [0.97, 1.06] | .51    |
| Somatic subscale of the CCEI at age 8 weeks**                 |                  | 6061 | 2.6 (1.7)  | 2.5 (1.6)   | 1.03 [0.95, 1.11] | .51    |
| Total of subscales of the CCEI at age 8 weeks**               |                  | 6061 | 9.3 (6.6)  | 9.1 (6.6)   | 1.00 [0.99, 1.02] | .64    |
|                                                               |                  |      |            |             |                   |        |
| Anxiety subscale of the CCEI at age 8 months**                |                  | 5978 | 3.4 (3.2)  | 3.5 (3.2)   | 0.99 [0.95, 1.04] | .76    |
| Depression subscale of the CCEI at age 8 months**             |                  | 5978 | 3.3 (2.8)  | 3.2 (2.9)   | 1.01 [0.97, 1.06] | .53    |
| Somatic subscale of the CCEI at age 8 months**                |                  | 5978 | 2.5 (1.8)  | 2.5 (1.7)   | 1.00 [0.93, 1.08] | .97    |
| Total of subscales of the CCEI at age 8 months**              |                  | 5978 | 9.3 (6.6)  | 9.2 (6.8)   | 1.00 [0.98, 1.02] | .90    |
|                                                               |                  |      |            |             |                   |        |
| Anxiety subscale of the CCEI at age 21 months**               |                  | 5767 | 3.4 (3.1)  | 3.7 (3.2)   | 0.97 [0.93, 1.02] | .21    |
| Depression subscale of the CCEI at age 21 months**            |                  | 5766 | 2.9 (2.7)  | 2.8 (2.6)   | 1.01 [0.96, 1.06] | .75    |
| Somatic subscale of the CCEI at age 21 months**               |                  | 5765 | 2.6 (2.1)  | 2.6 (1.8)   | 1.01 [0.94, 1.08] | .85    |
| Total of subscales of the CCEI at age 21 months**             |                  | 5767 | 9.6 (7.2)  | 9.7 (6.9)   | 1.00 [0.98, 1.02] | .78    |
|                                                               |                  |      |            |             |                   |        |
| Anxiety subscale of the CCEI at age 33 months**               |                  | 5603 | 4.6 (3.6)  | 4.6 (3.4)   | 0.99 [0.96, 1.03] | .77    |
| Depression subscale of the CCEI at age 33 months**            |                  | 5595 | 4.0 (3.0)  | 4.1 (3.1)   | 0.99 [0.95, 1.04] | .73    |
| Somatic subscale of the CCEI at age 33 months**               |                  | 5602 | 2.8 (1.9)  | 2.8 (2.0)   | 1.00 [0.94, 1.08] | .90    |
| Total of subscales of the CCEI at age 33 months**             |                  | 5601 | 11.4 (7.4) | 11.5 (7.4)  | 1.00 [0.98, 1.02] | .81    |
|                                                               |                  |      |            |             |                   |        |
| <b>Early speech and language performance</b>                  |                  |      |            |             |                   |        |
| MacArthur–Bates Understanding Vocabulary score at 38 months** |                  | 5770 | 10.3 (2.6) | 11.1 (2.3)  | 0.91 [0.87, 0.95] | < .001 |
| MacArthur–Bates Saying Vocabulary score at 38 months**        |                  | 5770 | 9.9 (3.2)  | 11.4 (1.6)  | 0.77 [0.73, 0.80] | < .001 |
| Intelligibility to mother at 38 months*                       | Mostly           | 5714 | 197 (3.5)  | 5378 (96.5) | 0.1               | < .001 |
|                                                               | Sometimes/rarely |      | 23 (16.5)  | 116 (83.5)  | 5.41 [3.39, 8.66] |        |
| Intelligibility to family at 38 months*                       | Mostly           | 5712 | 150 (2.9)  | 5051 (97.1) | 0.1               | < .001 |

|                                                                                                         |                    |      |              |              |                     |        |
|---------------------------------------------------------------------------------------------------------|--------------------|------|--------------|--------------|---------------------|--------|
|                                                                                                         | Sometimes/rarely   |      | 68 (13.3)    | 443 (86.7)   | 5.17 [3.82, 6.99]   |        |
| Intelligibility to others at 38 months*                                                                 | Mostly             | 5703 | 111 (2.4)    | 4526 (97.6)  | 0.1                 | < .001 |
|                                                                                                         | Sometimes/rarely   |      | 107 (10.0)   | 959 (90.0)   | 4.55 [3.46, 5.99]   |        |
| Uses gestures at or before 38 months*                                                                   | No, never did      | 5696 | 37 (2.2)     | 1632 (97.8)  | 1.0                 | < .001 |
|                                                                                                         | Yes, but not now   |      | 127 (3.5)    | 3465 (96.5)  | 1.62 [1.12, 2.34]   |        |
|                                                                                                         | Yes, still does    |      | 57 (13.1)    | 378 (86.9)   | 6.65 [4.33, 10.21]  |        |
| Word combination at 24 months *                                                                         | Often              | 5628 | 66 (2.0)     | 3171 (98.0)  | 1.0                 | < .001 |
|                                                                                                         | Sometimes          |      | 74 (4.8)     | 1462 (95.2)  | 2.43 [1.74, 3.41]   |        |
|                                                                                                         | Not yet            |      | 72 (8.4)     | 783 (91.6)   | 4.42 [3.14, 6.23]   |        |
| Word combination at 38 months*                                                                          | Often              | 5641 | 174 (3.3)    | 5121 (96.7)  | 1.0                 | < .001 |
|                                                                                                         | Sometimes          |      | 25 (8.7)     | 262 (91.3)   | 2.81 [1.81, 4.35]   |        |
|                                                                                                         | Not yet            |      | 18 (30.5)    | 41 (69.5)    | 12.92 [7.28, 22.95] |        |
| Word morphology at 38 months**                                                                          |                    | 5711 | 7.6 (3.5)    | 9.5 (2.8)    | 0.84 [0.81, 0.88]   | < .001 |
| Irregular grammar at 24 months**                                                                        |                    | 5750 | 13.1 (12.4)  | 19.5 (13.8)  | 0.96 [0.95, 0.97]   | < .001 |
| Stuttering*                                                                                             | Never              | 5675 | 111 (4.1)    | 2606 (95.9)  | 1.0                 | .45    |
|                                                                                                         | Sometimes          |      | 91 (3.5)     | 2549 (96.6)  | 0.84 [0.63, 1.11]   |        |
|                                                                                                         | Often              |      | 13 (4.1)     | 305 (95.9)   | 1.00 [0.56, 1.80]   |        |
| Denver Communication Scale at 6 months**                                                                |                    | 5561 | −0.03 (1.01) | −0.02 (0.96) | 1.00 [0.87, 1.14]   | .95    |
| Denver Communication Scale at 18 months**                                                               |                    | 5775 | −0.33 (1.10) | 0.04 (0.98)  | 0.68 [0.59, 0.78]   | < .001 |
|                                                                                                         |                    |      |              |              |                     |        |
| Early literacy and learning                                                                             |                    |      |              |              |                     |        |
| School entry assessment (age 4–5 years): Reading*                                                       | Achieved level     | 4633 | 54 (7.2)     | 698 (92.8)   | 1.0                 | < .001 |
|                                                                                                         | Above expectations |      | 130 (3.4)    | 3751 (96.7)  | 0.45 [0.32, 0.62]   |        |
| School entry assessment (age 4–5 years): Writing*                                                       | Achieved level     | 4634 | 76 (6.1)     | 1178 (93.9)  | 1.0                 | < .001 |
|                                                                                                         | Above expectations |      | 108 (3.2)    | 3272 (96.8)  | 0.51 [0.38, 0.69]   |        |
| Other early developmental                                                                               |                    |      |              |              |                     |        |
| Low birth weight*                                                                                       | > 2500 grams       | 6308 | 232 (3.9)    | 5746 (96.1)  | 1.0                 | .55    |
|                                                                                                         | ≤ 2500 grams       |      | 15 (4.6)     | 315 (95.5)   | 1.18 [0.69, 2.01]   |        |
| Avon Longitudinal Study of Parents and Children (ALSPAC) Developmental Scale Social score at 6 months** |                    | 5558 | −0.06 (1.07) | −0.00 (0.99) | 0.94 [0.82, 1.08]   | .36    |
| ALSPAC Developmental Scale Fine Motor at 6 months**                                                     |                    | 5537 | −0.18 [1.05] | −0.00 (0.98) | 0.83 [0.73, 0.96]   | .009   |
| ALSPAC Developmental Scale Gross Motor at 6                                                             |                    | 5547 | −0.04 (0.94) | 0.01 (0.97)  | 0.95 [0.83, 1.09]   | .48    |

|                                                             |                    |      |              |              |                   |                  |
|-------------------------------------------------------------|--------------------|------|--------------|--------------|-------------------|------------------|
| months**                                                    |                    |      |              |              |                   |                  |
| ALSPAC Developmental Scale Social score at 18 months**      |                    | 5786 | −0.17 (1.11) | 0.01 (0.98)  | 0.83 [0.72, 0.95] | <b>.005</b>      |
| ALSPAC Developmental Scale Fine Motor score at 18 months**  |                    | 5757 | −0.11 (1.11) | 0.05 (0.96)  | 0.86 [0.75, 0.98] | <b>.023</b>      |
| ALSPAC Developmental Scale Gross Motor at 18 months**       |                    | 5783 | −0.22 (1.29) | −0.00 (0.94) | 0.82 [0.73, 0.92] | <b>.002</b>      |
| ALSPAC Developmental Scale Social score at 30 months**      |                    | 5142 | −0.26 (1.05) | 0.02 (0.98)  | 0.76 [0.66, 0.87] | <b>&lt; .001</b> |
| ALSPAC Developmental Scale Fine Motor score at 30 months**  |                    | 5121 | −0.14 (1.06) | 0.06 (0.97)  | 0.82 [0.72, 0.94] | <b>.004</b>      |
| ALSPAC Developmental Scale Gross Motor score at 30 months** |                    | 5132 | −0.32 (1.26) | −0.01 (0.96) | 0.76 [0.67, 0.86] | <b>&lt; .001</b> |
| ALSPAC Developmental Scale Social score at 42 months**      |                    | 5328 | −0.24 (1.22) | 0.04 (0.95)  | 0.76 [0.67, 0.87] | <b>&lt; .001</b> |
| ALSPAC Developmental Scale Fine Motor score at 42 months**  |                    | 5332 | −0.32 (1.13) | 0.06 (0.97)  | 0.71 [0.63, 0.80] | <b>&lt; .001</b> |
| ALSPAC Developmental Scale Gross Motor score at 42 months** |                    | 5335 | −0.41 (1.26) | 0.01 (0.96)  | 0.70 [0.62, 0.78] | <b>&lt; .001</b> |
| School entry assessment (age 4–5 years): Large motor*       | Achieved level     | 1549 | 27 (7.9)     | 313 (92.1)   | 1.0               | <b>&lt; .001</b> |
|                                                             | Above expectations |      | 40 (3.3)     | 1169 (96.7)  | 0.40 [0.24, 0.66] |                  |
| School entry assessment (age 4–5 years): Fine motor*        | Achieved level     | 1739 | 16 (4.1)     | 372 (95.9)   | 1.0               | .79              |
|                                                             | Above expectations |      | 60 (4.4)     | 1291 (95.6)  | 1.08 [0.62, 1.90] |                  |
| Laterality at 42 months*                                    | Right              | 5700 | 138 (3.6)    | 3665 (96.4)  | 1.0               | <b>.069</b>      |
|                                                             | Mixed/left         |      | 88 (4.6)     | 1809 (95.4)  | 1.29 [0.98, 1.70] |                  |
| Weak sucking at 4 weeks*                                    | No                 | 6158 | 179 (3.5)    | 4879 (96.5)  | 1.0               | <b>.009</b>      |
|                                                             | Yes                |      | 58 (5.3)     | 1042 (94.7)  | 1.52 [1.12, 2.06] |                  |
| Choking at 4 weeks*                                         | No                 | 6158 | 108 (4.1)    | 2511 (95.9)  | 1.0               | .34              |
|                                                             | Yes                |      | 129 (3.7)    | 3410 (96.4)  | 0.88 [0.68, 1.1]  |                  |
| Dribbling at 4 weeks*                                       | No                 | 6158 | 107 (4.7)    | 2194 (95.4)  | 1.0               | <b>.013</b>      |
|                                                             | Yes                |      | 130 (3.4)    | 3727 (96.6)  | 0.72 [0.55, 0.93] |                  |
| Drinking too fast at 4 weeks*                               | No                 | 6158 | 49 (5.0)     | 930 (95.0)   | 1.0               | <b>.048</b>      |
|                                                             | Yes                |      | 188 (3.6)    | 4991 (96.4)  | 0.71 [0.52, 0.99] |                  |
| Exhaustion with feeding at 4 weeks*                         | No                 | 6158 | 121 (3.8)    | 3059 (96.2)  | 1.0               | .85              |
|                                                             | Yes                |      | 116 (3.9)    | 2862 (96.1)  | 1.02 [0.79, 1.33] |                  |
| Slow feeding at 4 weeks*                                    | No                 | 6158 | 141 (3.8)    | 3545 (96.2)  | 1.0               | .91              |

|                                  |     |      |           |             |                   |             |
|----------------------------------|-----|------|-----------|-------------|-------------------|-------------|
|                                  | Yes |      | 96 (3.9)  | 2376 (96.1) | 1.02 [0.78, 1.32] |             |
| Small quantity feeds at 4 weeks* | No  | 6158 | 120 (3.9) | 2944 (96.1) | 1.0               | .78         |
|                                  | Yes |      | 117 (3.8) | 2977 (96.2) | 0.96 [0.74, 1.25] |             |
| Baby being unsatisfied*          | No  | 6158 | 106 (3.7) | 2739 (96.3) | 1.0               | .64         |
|                                  | Yes |      | 131 (4.0) | 3182 (96.0) | 1.06 [0.82, 1.38] |             |
| Refusing milk*                   | No  | 6158 | 206 (3.7) | 5295 (96.3) | 1.0               | .23         |
|                                  | Yes |      | 31 (4.7)  | 626 (95.3)  | 1.27 [0.86, 1.87] |             |
| Difficulties feeding*            | No  | 6127 | 195 (3.6) | 5184 (96.4) | 1.0               | <b>.088</b> |
|                                  | Yes |      | 37 (5.0)  | 711 (95.1)  | 1.38 [0.97, 1.98] |             |

<sup>a</sup>This column shows how the variables were grouped in the second stage within group multivariable analysis. <sup>b</sup>Where the variable of interest is categorical, the two numbers refer to *n* and (%) where % is the percentage within the factor category. The reference category for each variable can be identified by its odds ratio of 1.0. Where the variable of interest is continuous, the numbers are mean (and standard deviation) and the odds ratio relates to the change in odds for a one-unit increase in the exposure variable. The exception to this is the odds ratio for IQ and the MacArthur–Bates scores, which are based on a change of ten units.

\*Categorical. \*\*Continuous. ‡For categorical variables only. †Supplemented with father’s social class when the mother’s was not available. §People per room.

---

<sup>i</sup>O’level was the qualification obtained at age 16 years when the parents of the cohort were at school.
